# Supplementary material for: Novel function of HATs and HDACs in homologous recombination through acetylation of human RAD52 at double-strand break sites
Source: PubMed Central journal article supplement (PMC5891081; doi:10.1371/journal.pgen.1007277), 2018-03-28
Supplement: pgen.1007277.s003.pdf [file pgen.1007277.s003.pdf]

M. musculus 121 YHEDVGYGVSEGLRSKALSLEKARKEAVTDGLKRALRSFGNALGNCILDKDYLRSLNKLPRQLPLEVDLTKTKRKDFEPSVEQARYNSCR 210  
R. norvegicus 121 YHEDVGYGVSEGLRSKALSLEKARKEAVTDGLKRALRSFGNALGNCILDKDYLRSLNRLPRQLPLEVDLTKKREDFEPSVEQARYNSCR 210  
C. griseus 121 YHEDVGYGVSEGLRSKALSLEKARKEAVTDGLKRALRSFGNALGNCILDKDYLRSLNKLPRQLPLEVDLTKAKREDFEPSVEQARYNSCL 210  
H. sapiens 120 YHEDVGYGVSEGLRSKALSLEKARKEAVTDGLKRALRSFGNALGNCILDKDYLRSLNKLPRQLPLEVDLTKAKRQDLEPSVEEARYNSCR 209  
P. troglodytes 120 YHEDVGYGVSEGLRSKALSLEKARKEAVTDGLKRALRSFGNALGNCILDKDYLRSLNKLPCQLPLEVDLTKAKRQDLEPSVEEARYNSCR 209  
R. monkey 120 YHEDVGYGVSEGLRSKALSLEKARKEAVTDGLKRALRSFGNALGNCVLDKDYLRSLNKLPRQLPLEVDLTKAKRQDLEPSVEEARYNSCR 209  
G. gallus 121 YHEDVGYGVSEGLRSKALSLEKARKEAVTDGLKRALKCFGNALGNCILDKDYLRSLNKLPRQMPPELDLVKTKRQDYEPETIEKARYDGCCL 210  
X. laevis 117 YHEDVGYGVSEGLRSKALSLEKARKEAVTDGLKRALKCFGNALGNCILDKDYLRSLNKLPRQMPPELDLVKTKRQDYEPETIEKARYDGCCL 206

M. musculus 211 QNEALGLPKPQE-----VTSPCRSSPPHDSNIKLGAKDISSS-CSLAATLES DATHQRKLRKLRQKQLQQQFR--EQMETRRQSHA 289  
R. norvegicus 211 QDKASGLPKPQE-----AASPCRPSPHDSNIKLGAKDSSSSCSLATTSESDATHQRKLRKLRQKQLQQQFRGTDGGETLSQTNT 292  
C. griseus 211 QNEAPGPPKQPE-----AASPCRPSPHDSNIKLGAKDCSSS-CSLAAPMESDAIHQRKLRKLRQKQLQQQFR--QQMEAHLQGH 289  
H. sapiens 210 PNMALGHPQLQQ-----VTSFSPRPSH-----AVIPADQDCSSR-SLSSSAVESEATHQRKLR--QKQLQQQFR--ERMEK--QQVR 278  
P. troglodytes 210 PNMALGHPQLQE-----ATSPSRPSH-----AVIQADKDCSSR-SLTSSSAVESEATHQRKLR--QKQLQQQFR--ERMEK--QHV 278  
R. monkey 210 PNMALGHPQLQE-----VTSFSPRPSR-----VVIQGDKDCSSR-GLTSSSTVESEATYQRKLR--QKQLQQQFR--ERMEK--QHV 278  
G. gallus 211 ERQNPGRWQCE-----TAPTCKPTHTEASGVTEQKQPSSSGNTDSPAVECDATYQRKLR--QKQLQQQFW--EQMEKRRQVKE 286  
X. laevis 207 QAQKQAEPRQPEPVVQLPLRSSDPSLSEHNHEGSTRISPEDNCTSTGSAMSYPDMDATYQRKLR--QKQLQQQFR--EQMERKQQTRE 291

M. musculus 290 PA---EEVAAKH-AVLPAPP-KHSTPVTAASELLQEKVVF-----DNLEENLEMWDLTPDLED-----IIKPLCRAEPAQTSATRTF 362  
R. norvegicus 293 SQ---RHPPPPHSAALPAPP-KHSTPVPAASACLREKAVLP-----DNLEENLEMWDLTPDLED-----IIKPLCRTEPPQTSVTRTL 366  
C. griseus 290 PA---VKVKAEREAVLPDLPPKHSTPVTAASELLREKAIFP-----DNPEDNLEMWDLTPDLED-----IIKPLSRPEPPQTSATRVQ 364  
H. sapiens 279 VS---TPSAEKSEAAPAPPVTHSTPVT-VSEPLEKDFLAGVTQELIKTLEDNSEKWAVTPDAGDG---VVKPSSRADPAQTSIDLAL 360  
P. troglodytes 279 VS---TPSAEKSEAAPAPPVTHSTPVT-VSEPLEKDFLAGVTQELIKTLEDNSEKWAVTPDAGDG---VVRPSSTADPAQASIDLAL 359  
R. monkey 279 VS---RPSAEKSEARAAPPVTHSTPVTAVSEPLEKDFLAGVTQELIKTLEDNSEKWAVTPDAGDG---VAKPSSRADPAQAADTLAL 361  
G. gallus 287 ---VTPSSKQATAN---PPVKHSTPAAVQ-Q-ELAIIEEFF-----ADDLELWDISLETDLNKLKMKHKAAGSPAAQPPETPHR 358  
X. laevis 292 PETLPDTSREGTAYPARVPLGHSTPAAAAQPQVAPEEEFL-----ADDPELWDIPLDAVEMDPPSNGRIQVPSAVSTPVAPHG 371

M. musculus 363 NN---QDSVPHIHCHQKQP---EKPGPGHLQTCNTNQHVLSGREDSEPHRSKQ--DLKRRKLDPS 419  
R. norvegicus 367 NNQAVIQDSVPHIHCHQKQV---EKPGPGHLQTCSTNQHVLSGRENSESHRSKQ--DLKRRKLDPS 427  
C. griseus 365 VI---QDGLVHLGLCHQMP---EKHEAGHLQAHSTHQLVGL---NSDSHRSKQ--DLKRRKLDPS 418  
H. sapiens 361 NNQMVTONRTPHSVCHQKQP---AKSGSWDLQTYSDQRTTG---NWESHRSKQ--DMKKRKYDPS 418  
P. troglodytes 360 NNQMVTONRTPHSVCHQKQP---AKSGSWDLQTYSDQRTTG---NWESHRSKQ--DMKKRKYDPS 417  
R. monkey 362 NHQMVTONRTPHSVCHQKQP---AKSGSWDLQTYSDQRTTG---NWESHRSKQ--DMKKRKYDPS 419  
G. gallus 359 RHQMTTRNRTQRMHYHKPPVRFQALQPSAALTNSHGANQRTPAEHSFYRRSQ--SWKRRLEPT 422  
X. laevis 372 QHQLMTRSKTPQRQNHQR-----QPLRPTSWNQPNGNPAPRLDRSPYQHQGLLMKRRLEPS 429

S2 Fig
