# Supplementary material for: Novel function of HATs and HDACs in homologous recombination through acetylation of human RAD52 at double-strand break sites
Source: PubMed Central journal article supplement (PMC5891081; doi:10.1371/journal.pgen.1007277), 2018-03-28
Supplement: pgen.1007277.s005.pdf [file pgen.1007277.s005.pdf]

**A**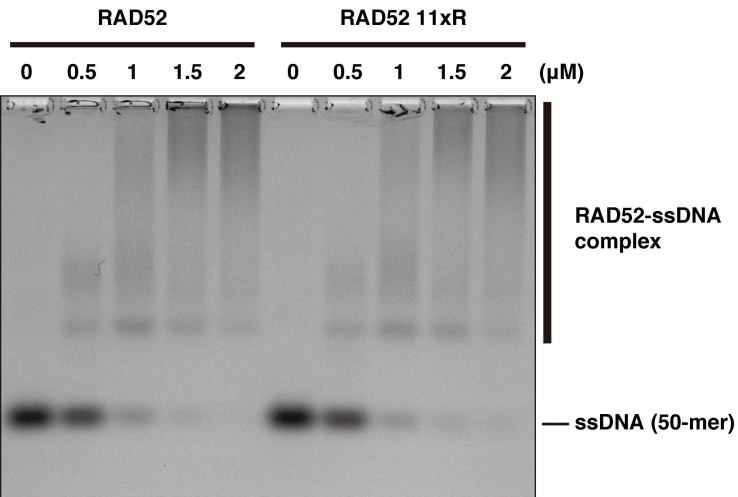**B**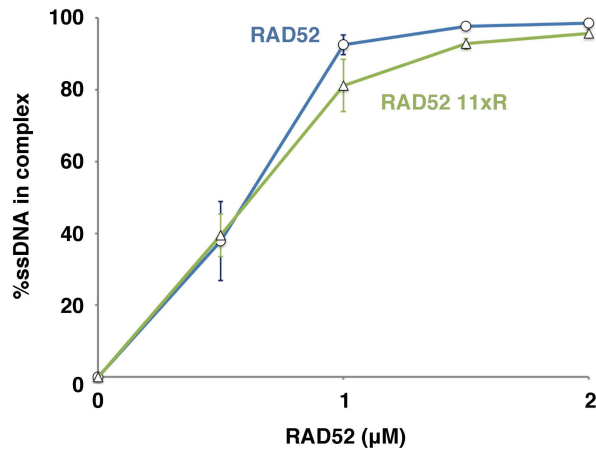**S4 Fig**
