# Supplementary material for: Novel function of HATs and HDACs in homologous recombination through acetylation of human RAD52 at double-strand break sites
Source: PubMed Central journal article supplement (PMC5891081; doi:10.1371/journal.pgen.1007277), 2018-03-28

**A**

RAD52 genome DNA region upstream start codon (1000 bp)

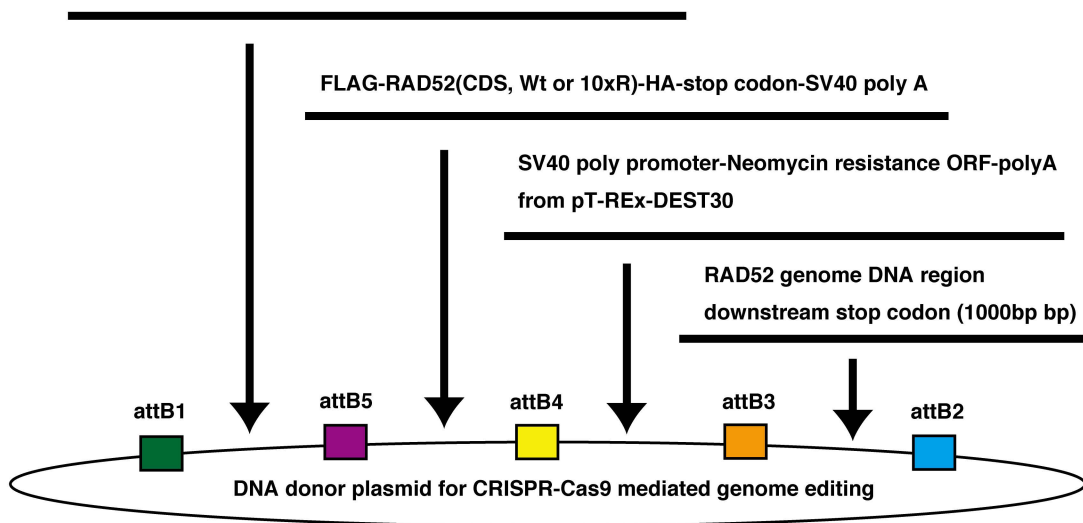**B**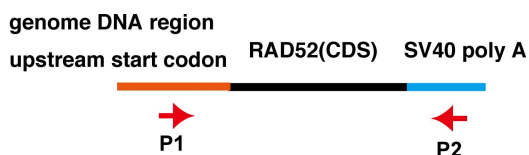**C**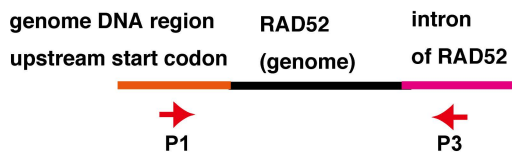**D**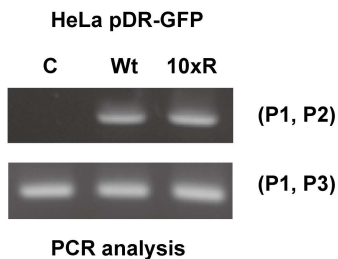**E**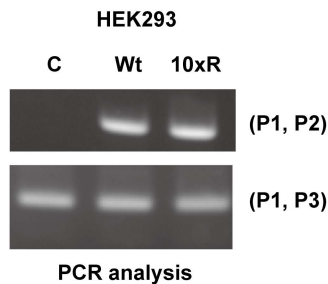**F**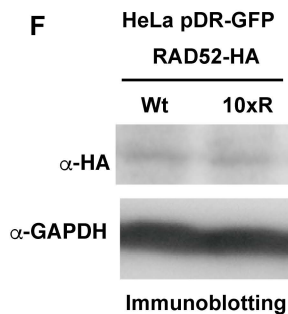**G**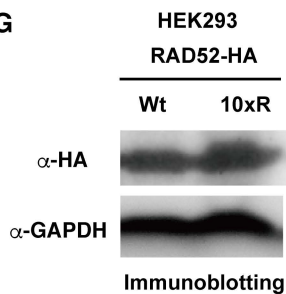

Supplement: pgen.1007277.s010.pdf [file pgen.1007277.s010.pdf]
