# Supplementary material for: Novel function of HATs and HDACs in homologous recombination through acetylation of human RAD52 at double-strand break sites
Source: PubMed Central journal article supplement (PMC5891081; doi:10.1371/journal.pgen.1007277), 2018-03-28
Supplement: pgen.1007277.s013.pdf [file pgen.1007277.s013.pdf]

# Yeast two-hybrid analysis

SC-Leu-Trp

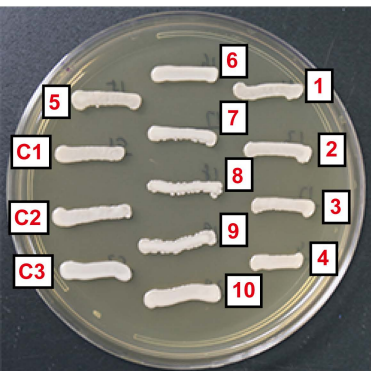

SC-Leu-Trp-His + 25 mM 3AT

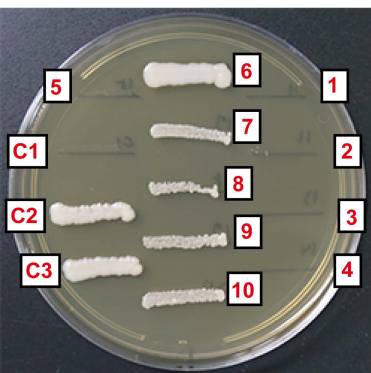

|           | NLS-GAL4 AD | GAL4 DBD   |
|-----------|-------------|------------|
| <b>1</b>  | RAD52 (Wt)  | -          |
| <b>2</b>  | RAD51       | -          |
| <b>3</b>  | RPA1        | -          |
| <b>4</b>  | RPA2        | -          |
| <b>5</b>  | RPA3        | -          |
| <b>6</b>  | RAD52 (Wt)  | RAD52 (Wt) |
| <b>7</b>  | RAD51       | RAD52 (Wt) |
| <b>8</b>  | RPA1        | RAD52 (Wt) |
| <b>9</b>  | RPA2        | RAD52 (Wt) |
| <b>10</b> | RPA3        | RAD52 (Wt) |
| <b>C1</b> | RalGDS-m2   | Krev1      |
| <b>C2</b> | RalGDS-m1   | Krev1      |
| <b>C3</b> | RalGDS-wt   | Krev1      |

negative control

positive control

positive control

S12 Fig
