# Supplementary material for: Novel function of HATs and HDACs in homologous recombination through acetylation of human RAD52 at double-strand break sites
Source: PubMed Central journal article supplement (PMC5891081; doi:10.1371/journal.pgen.1007277), 2018-03-28
Supplement: pgen.1007277.s015.pdf [file pgen.1007277.s015.pdf]

## S1 Table. Mascot search results of tryptic-peptide fragment of acetylated RAD52 (FL)

Matched peptides shown in red

1 MSGTEEAILG GRDSHPAAGG GSVLCFGQCQ YTAEEYQAIQ KALRQLGPE  
 51 YISSRMAGGG QKVCYIEGHR VINLANEMFG YNGWAHSITQ QNVDFVDLNN  
 101 GKFYVGVCAF VRVQLKDGSY HEDVGYGVSE GLKSKALSLE KARKEAVTDG  
 151 LKRALRSFGN ALGNCILDKD YLRSLNKLPR QLPLEVDLTK AKRQDLEPSV  
 201 EEARYNSCRP NMALGHPQLQ QVTSPSRPSH AVIPADQDCS SRSLSSSAVE  
 251 SEATHQRKLR QKQLQQQFRE RMEKQQVRVS TPSAEKSEAA PPAPPVTHST  
 301 PVTVSEPLLE KDFLAGVTQE LIKTLEDNSE KWAVTPDAGD GVVKPSRAD  
 351 PAQTSIDLAL NNQMVTQNRT PHSVCHQKPO AKSGSWDLQT YSADQRTTGN  
 401 WESHRSQDM KKRKYDPS

Cleavage by Trypsin: cuts C-terminal side of KR unless next residue is P  
 Sequence Coverage: 73%

a: Residue number of first and last amino acid of peptide fragment

b: Observed m/z value of precursor

c: Experimental molecular weight of precursor

d: Theoretical molecular weight of precursor

e: Difference between Mr (exp) and Mr (calc)

f: Number of missed cleavage

g: Cleavage site (.) in peptide sequence

| Acetyl site    | Start-End <sup>a</sup> | Observed <sup>b</sup> | Mr (exp) <sup>c</sup> | Mr (calc) <sup>d</sup> | Delta <sup>e</sup> | Miss <sup>f</sup> | Ion score | Sequence (variable modifications) <sup>g</sup>    |
|----------------|------------------------|-----------------------|-----------------------|------------------------|--------------------|-------------------|-----------|---------------------------------------------------|
| K190           | 181 - 192              | 698.6200              | 1395.2254             | 1395.7973              | -0.5719            | 1                 | 26        | R.QLPLEVDLTKAK.R (Acetyl (K))                     |
| K190           | 181 - 192              | 698.6200              | 1397.5054             | 1395.7973              | 1.7081             | 1                 | 50        | R.QLPLEVDLTKAK.R (Acetyl (K))                     |
| K190, 192      | 181 - 193              | 798.6600              | 1595.3054             | 1593.9090              | 1.3965             | 2                 | 47        | R.QLPLEVDLTKAKR.Q (2Acetyl (K))                   |
| K192           | 191 - 204              | 835.6500              | 1669.2854             | 1668.8431              | 0.4424             | 2                 | 62        | K.AKRQDLEPSVEEAR.Y (Acetyl (K))                   |
| K262           | 261 - 269              | 624.2600              | 1246.5054             | 1244.6626              | 1.8429             | 1                 | 47        | R.QKQLQQQFR.E (Acetyl (K))                        |
| K284           | 279 - 311              | 1133.1900             | 3396.5482             | 3394.7508              | 1.7974             | 1                 | 62        | R.VSTPSAEKSEAPPAPPVTHSTPVTVSEPLLEK.D (Acetyl (K)) |
| K344           | 332 - 348              | 892.6400              | 1783.2654             | 1782.8901              | 0.3754             | 0                 | 54        | K.WAVTPDAGDGVVKPSR.A (Acetyl (K))                 |
| K406, 411, 412 | 406 - 413              | 574.1900              | 1146.3654             | 1145.5862              | 0.7792             | 3                 | 60        | R.KSQDMKKR.K (3Acetyl (K))                        |
| K406, 411, 412 | 406 - 413              | 582.2700              | 1162.5254             | 1161.5812              | 0.9443             | 3                 | 39        | R.KSQDMKKR.K (Oxidation (M); 3Acetyl (K))         |

Results of the Identified acetylated peptide fragments are shown.
