# Supplementary material for: Novel function of HATs and HDACs in homologous recombination through acetylation of human RAD52 at double-strand break sites
Source: PubMed Central journal article supplement (PMC5891081; doi:10.1371/journal.pgen.1007277), 2018-03-28
Supplement: pgen.1007277.s016.pdf [file pgen.1007277.s016.pdf]

## S2 Table. Mascot search results of Asp-N peptide fragment of acetylated RAD52 (FL)

Matched peptides shown in red

1 MSGTEEAILG GRDSPAAGG GSVLCFGQCQ YTAEEYQAIQ KALRQLGPE  
 51 YISSRMAGGG QKVCYIEGHR VINLANEMFG YNGWAHSITQ QNVDFVDLNN  
 101 GKFYVGVCAF VRVQLKDGSY HEDVGYGVSE GLKSKALSLE KARKEAVTDG  
 151 LKRALRSFGN ALGNCILDKD YLRSLNKLPR QLPLEVDLTK AKRQDLEPSV  
 201 EEARYNSCRP NMALGHPQLQ QVTSPSRPSH AVIPADQDCS SRSLSSSAVE  
 251 SEATHQRKLR QKQLQQQFRE RMEKQQVRVS TPSAEKSEAA PPAPPVTHST  
 301 PVTVSEPLLE KDFLAGVTQE LIKTLEDNSE KWA VTPDAGD GVVKPSSRAD  
 351 PAQTSIDLAL NNQMVTQNRT PHSVCHQKPK AKSGSWDLQT YSADQRTTGN  
 401 WESHRKSQDM KKRKYDPS

Cleavage by Asp-N: cuts N-terminal side of DE

Sequence Coverage: 40%

| Acetyl site    | Start-End | Observed  | Mr (exp)  | Mr (calc) | Delta   | Miss | Ion score | Sequence (variable modifications)        |
|----------------|-----------|-----------|-----------|-----------|---------|------|-----------|------------------------------------------|
| K190, 192      | 187 - 194 | 522.7700  | 1043.5254 | 1042.5771 | 0.9484  | 0    | 43        | V.DLTAKAKRQ.D (2Acetyl (K))              |
| K274           | 273 - 284 | 1371.7100 | 1370.7027 | 1370.7154 | -0.0127 | 0    | 25        | M.EKQQVRVSTPSA.E (Acetyl (K))            |
| K274           | 273 - 284 | 686.7900  | 1371.5654 | 1370.7154 | 0.8501  | 0    | 37        | M.EKQQVRVSTPSA.E (Acetyl (K))            |
| K286           | 273 - 287 | 858.7800  | 1715.5454 | 1714.8849 | 0.6605  | 1    | 32        | M.EKQQVRVSTPSAEKS.E (Acetyl (K))         |
| K274, 286      | 273 - 287 | 879.8200  | 1757.6254 | 1756.8955 | 0.7299  | 1    | 46        | M.EKQQVRVSTPSAEKS.E (2Acetyl (K))        |
| K286           | 285 - 305 | 1073.1500 | 2144.2854 | 2143.0797 | 1.2057  | 1    | 34        | A.EKSEAAPPAPPVTHSTPVTVS.E (Acetyl (K))   |
| K323           | 320 - 326 | 887.6200  | 886.6127  | 886.5011  | 0.1116  | 1    | 24        | Q.ELIKTLE.D (Acetyl (K))                 |
| K344           | 340 - 349 | 529.7300  | 1057.4454 | 1056.5564 | 0.8891  | 0    | 25        | G.DGVV KPSSRA.D (Acetyl (K))             |
| K411, 412, 414 | 409 - 415 | 556.2400  | 1110.4654 | 1109.5539 | 0.9116  | 0    | 34        | Q.DMKKRKY.D (3Acetyl (K); Oxidation (M)) |

Results of the Identified acetylated peptide fragments are shown.
