# Supplementary material for: Novel function of HATs and HDACs in homologous recombination through acetylation of human RAD52 at double-strand break sites
Source: PubMed Central journal article supplement (PMC5891081; doi:10.1371/journal.pgen.1007277), 2018-03-28
Supplement: pgen.1007277.s017.pdf [file pgen.1007277.s017.pdf]

### S3 Table. Mascot search results of peptide fragment of acetylated RAD52 (N)

Cleavage by Trypsin: cuts C-terminal side of KR unless next residue is P

| Acetyl site  | Start-End | Observed  | Mr (exp)  | Mr (calc) | Delta   | Miss | Ion score | Sequence                                                 |
|--------------|-----------|-----------|-----------|-----------|---------|------|-----------|----------------------------------------------------------|
| K190         | 181 - 192 | 1379.9700 | 1378.9627 | 1378.7708 | 0.1920  | 1    | 45        | R.QLPLEVDLTKAK.R (Gln->pyro-Glu (N-term Q); Acetyl (K))  |
| K190         | 181 - 192 | 690.9700  | 1379.9254 | 1378.7708 | 1.1547  | 1    | 56        | R.QLPLEVDLTKAK.R (Gln->pyro-Glu (N-term Q); Acetyl (K))  |
| K190         | 181 - 192 | 698.5300  | 1395.0454 | 1395.7973 | -0.7519 | 1    | 32        | R.QLPLEVDLTKAK.R (Acetyl (K))                            |
| K190         | 181 - 192 | 699.2600  | 1396.5054 | 1395.7973 | 0.7081  | 1    | 45        | R.QLPLEVDLTKAK.R (Acetyl (K))                            |
| K190 or K192 | 181 - 193 | 769.0500  | 1536.0854 | 1534.8719 | 1.2136  | 2    | 45        | R.QLPLEVDLTKAKR.Q (Gln->pyro-Glu (N-term Q); Acetyl (K)) |
| K190, 192    | 181 - 193 | 1577.7500 | 1576.7427 | 1576.8824 | -0.1397 | 2    | 35        | R.QLPLEVDLTKAKR.Q (Gln->pyro-Glu (N-term Q); Acetyl (K)) |
| K190, 192    | 181 - 193 | 789.9800  | 1577.9454 | 1576.8824 | 1.0630  | 2    | 64        | R.QLPLEVDLTKAKR.Q (Gln->pyro-Glu (N-term Q); Acetyl (K)) |
| K190, 192    | 181 - 193 | 798.1000  | 1594.1854 | 1593.9090 | 0.2765  | 2    | 39        | R.QLPLEVDLTKAKR.Q (2Acetyl (K))                          |
| K190, 192    | 181 - 193 | 798.2000  | 1594.3854 | 1593.9090 | 0.4765  | 2    | 27        | R.QLPLEVDLTKAKR.Q (2Acetyl (K))                          |
| K190, 192    | 181 - 193 | 798.2900  | 1594.5654 | 1593.9090 | 0.6565  | 2    | 41        | R.QLPLEVDLTKAKR.Q (2Acetyl (K))                          |
| K190, 192    | 181 - 193 | 798.3000  | 1594.5854 | 1593.9090 | 0.6765  | 2    | 36        | R.QLPLEVDLTKAKR.Q (2Acetyl (K))                          |
| K190, 192    | 181 - 193 | 798.3500  | 1594.6854 | 1593.9090 | 0.7765  | 2    | 46        | R.QLPLEVDLTKAKR.Q (2Acetyl (K))                          |
| K190, 192    | 181 - 204 | 950.7900  | 2849.3482 | 2847.4977 | 1.8504  | 3    | 33        | R.QLPLEVDLTKAKRQDLEPSVEEAR.Y (2Acetyl (K))               |
| K192         | 191 - 204 | 835.7500  | 1669.4854 | 1668.8431 | 0.6424  | 2    | 69        | K.AKRQDLEPSVEEAR.Y (Acetyl (K))                          |
| K192         | 191 - 204 | 557.7900  | 1670.3482 | 1668.8431 | 1.5051  | 2    | 36        | K.AKRQDLEPSVEEAR.Y (Acetyl (K))                          |

Cleavage by Asp-N: cuts N-terminal side of DE

| Acetyl site | Start-End | Observed | Mr (exp)  | Mr (calc) | Delta   | Miss | Ion score | Sequence (variable modifications)  |
|-------------|-----------|----------|-----------|-----------|---------|------|-----------|------------------------------------|
| K133        | 123 - 139 | 883.6200 | 1765.2254 | 1763.9305 | 1.2949  | 1    | 37        | E.DVGYGVSEGLKSKALSL.E (Acetyl (K)) |
| K177        | 170 - 184 | 935.0900 | 1868.1654 | 1867.0679 | 1.0975  | 0    | 21        | K.DYLRSLNKLPRQLPL.E (Acetyl (K))   |
| K177        | 170 - 186 | 699.9500 | 2096.8282 | 2095.1789 | 1.6492  | 1    | 27        | K.DYLRSLNKLPRQLPLEV.D (Acetyl (K)) |
| K190, 192   | 187 - 194 | 522.1100 | 1042.2054 | 1042.5771 | -0.3716 | 0    | 22        | V.DLTKAKRQ.D (2Acetyl (K))         |
| K190, 192   | 187 - 194 | 522.7700 | 1043.5254 | 1042.5771 | 0.9484  | 0    | 43        | V.DLTKAKRQ.D (2Acetyl (K))         |

Results of the Identified acetylated peptide fragments are shown.
